# Supplementary material
Source: ML conference proceedings conference paper supplement (https://openaccess.thecvf.com/content/cvpr_2017/html/Bian_GMS_Grid-based_Motion_2017_CVPR_paper.html)
Supplement: Supplementary file 1 [file Bian_GMS_Grid-based_Motion_2017_CVPR_supplemental.pdf]

Archive with 22 entries (20 files):
- Supplementary/
- Supplementary/GMS_ZuBud/
- Supplementary/GMS_ZuBud/1.jpg
- Supplementary/GMS_ZuBud/10.jpg
- Supplementary/GMS_ZuBud/11.jpg
- Supplementary/GMS_ZuBud/12.jpg
- Supplementary/GMS_ZuBud/13.jpg
- Supplementary/GMS_ZuBud/14.jpg
- Supplementary/GMS_ZuBud/15.jpg
- Supplementary/GMS_ZuBud/16.jpg
- Supplementary/GMS_ZuBud/17.jpg
- Supplementary/GMS_ZuBud/2.jpg
- Supplementary/GMS_ZuBud/3.jpg
- Supplementary/GMS_ZuBud/4.jpg
- Supplementary/GMS_ZuBud/5.jpg
- Supplementary/GMS_ZuBud/6.jpg
- Supplementary/GMS_ZuBud/7.jpg
- Supplementary/GMS_ZuBud/8.jpg
- Supplementary/GMS_ZuBud/9.jpg
- Supplementary/GMS_ZuBud/ReadMe.txt
- Supplementary/supplementary.pdf
- Supplementary/VideDemoLInk.txt
