# Supplementary material
Source: ML conference proceedings conference paper supplement (https://openaccess.thecvf.com/content/cvpr_2017/html/Bian_GMS_Grid-based_Motion_2017_CVPR_paper.html)
Supplement: Supplementary file 1 [file Bian_GMS_Grid-based_Motion_2017_CVPR_supplemental.pdf › Supplementary/GMS_ZuBud/ReadMe.txt]

This is the gms matching result after RANSAC(fundamental matrix) on Zubud(Repeated Structure) Dataset.

The all 17 image pairs ,selected by [1], are very difficult, so that many state-of-art algorithms all fails. 
Here, we show that our gms matching gets acceptable results. 


[1] Epipolar Geometry Estimation for Urban Scenes with Repetitive Structures. Kushnir, Maria and Shimshoni, Ilan. IEEE TPAMI 2014
