# Supplementary material
Source: ML conference proceedings conference paper supplement (https://openaccess.thecvf.com/content/cvpr_2017/html/Bian_GMS_Grid-based_Motion_2017_CVPR_paper.html)
Supplement: Supplementary file 1 [file Bian_GMS_Grid-based_Motion_2017_CVPR_supplemental.pdf › Supplementary/supplementary.pdf]

# GMS: Grid-based Motion Statistics for Fast, Ultra-robust Feature correspondence

Anonymous CVPR submission

Paper ID 1703

## 1. Contents

The supplementary contains experiments and analysis that do not fit comfortably in the main paper. a) One of *GMS*'s advantages is that apart from smoothness, it make no a-prior motion assumptions. Section 2 shows *GMS* can comfortably computer correspondence on datasets typically employed for demonstrating multi-body *RANSAC*. b) Section 3 shows *GMS* can work in many challenging non-traditional matching scenes. c) Section 4 provides timing breakdowns for *GMS* and other algorithms. d) Finally, we include 3 sample videos in the supplementary material.

## 2. Independent motion

Fig. 1 shows *GMS* is not influenced by independent motion. The first image's spatially varying color is propagated to the second image by our correspondence.

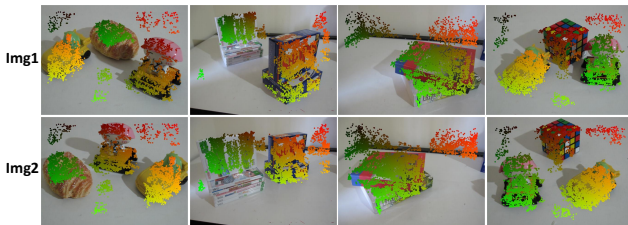

Figure 1. Corresponding feature points in each image is marked with the same color.

## 3. Extreme cases

One drawback of the main paper's standard evaluations is that algorithm performance on extreme cases are buried in general statistics. Fig 2 shows matching on non-traditional scenes. We include Deep-Matching the input to most optical flow algoirthms, *SIFT* one of the most respected feature matchers and *BF* the leading technique in the main-body.

Fig 2 a) shows that *GMS* can sometime outperform even *BF*. b) shows *GMS* can avoid matching scenes that look similar but actually belong to different places. c) shows that

*GMS* parameters are robust enough to avoid matching extreme repeated structures.

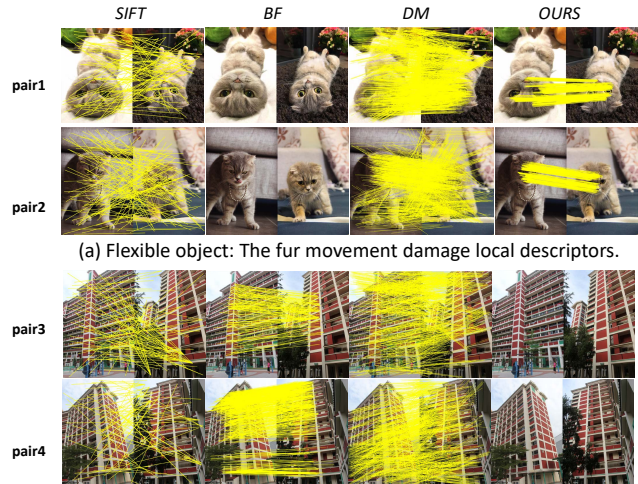

(b) Visually similar but physically different scenes.

(c) Repetitive Structure: Central towers belong to different places.

Figure 2. (a) Flexible object makes motion not continuous, so the Deep-Matching breaks down easily in this scene. (b) Different places should not be matched. Unlike other feature matchers, *GMS* is quite reliable at rejecting such image pairs. (c) Note *GMS*'s excellent performance on repeated structures.

## 4. Time

A break-down of time consumption for each algorithm is listed in Tab.1. Note that *SIFT* and *SURF* in Tab.1 are listed with CPU based speeds. However, they have real-time *GPU* implementations

| Methods            | SIFT [5] | SURF [1] | ORB [8] | SR [6] | OURS  | BF [3]  | BD [4]  | DM [10] | GAIM [2] | LIFT [11] |
|--------------------|----------|----------|---------|--------|-------|---------|---------|---------|----------|-----------|
| $T_{Feature}(ms)$  | 150.8    | 33.8     | 11.0    | 150.8  | 36.0  | 1,191.3 | 151.5   | \       | 2,641.0  | 16,747.8  |
| $T_{Match}(ms)$    | 24.3     | 12.5     | 1.2     | 24.3   | 24.1  | 842.0   | 24.3    | \       | 230.0    | 65.3      |
| $T_{Decision}(ms)$ | \        | \        | \       | 5.3    | 0.8   | 3,522.7 | 6,424.0 | 9,848.3 | 5,282.2  | \         |
| Speed(fps)         | 6.63     | 29.58    | 90.91   | 6.63   | 27.78 | 0.28    | 0.16    | 0.10    | 0.19     | 0.06      |

Table 1. Feature extraction, nearest-neighbor match, and match decision process can be easily parallized. Thus,  $Bottleneck = \max(T_{Feature}, T_{Match}, T_{Process})$ . The time records are evaluated on VGA images, with  $480 \times 640$  resolution, from TUM [9] dataset.

## 5. Video demo

We attach three video demos.

## References

- [1] H. Bay, T. Tuytelaars, and L. V. Gool. SURF: Speeded up robust features. In *Proc. of European Conf. on Computer Vision*, pages 404–417, 2006. 2
- [2] T. Collins, P. Mesejo, and A. Bartoli. An analysis of errors in graph-based keypoint matching and proposed solutions. In *European Conference on Computer Vision*, pages 138–153. Springer, 2014. 2
- [3] W.-Y. Lin, M.-M. Cheng, J. Lu, H. Yang, M. N. Do, and P. Torr. Bilateral functions for global motion modeling. In *Proc. of European Conf. on Computer Vision*, pages 341–356, 2014. 2
- [4] Y. Lipman, S. Yagev, R. Poranne, D. W. Jacobs, and R. Basri. Feature matching with bounded distortion. *ACM Transactions on Graphics (TOG)*, 33(3):26, 2014. 2
- [5] D. G. Lowe. Distinctive image features from scale-invariant keypoints. *Int’l Journal of Computer Vision*, 60(2):91–110, 2004. 2
- [6] R. Raguram, O. Chum, M. Pollefeys, J. Matas, and J. Frahm. Usac: A universal framework for random sample consensus. *IEEE Trans. on Pattern Analysis and Machine Intelligence*, 35(8):2022–2038, 2013. 2
- [7] J. Revaud, P. Weinzaepfel, Z. Harchaoui, and C. Schmid. EpicFlow: Edge-Preserving Interpolation of Correspondences for Optical Flow. In *Computer Vision and Pattern Recognition*, 2015. 199
- [8] E. Rublee, V. Rabaud, K. Konolige, and G. Bradski. Orb: An efficient alternative to sift or surf. In *Proc. of Int’l Conf. on Computer Vision*, pages 2564–2571, 2011. 2
- [9] J. Sturm, N. Engelhard, F. Endres, W. Burgard, and D. Cremers. A benchmark for the evaluation of rgb-d slam systems. In *Proc. of the International Conference on Intelligent Robot Systems (IROS)*, Oct. 2012. 2
- [10] P. Weinzaepfel, J. Revaud, Z. Harchaoui, and C. Schmid. DeepFlow: Large displacement optical flow with deep matching. In *IEEE International Conference on Computer Vision (ICCV)*, Sydney, Australia, Dec. 2013. 2
- [11] K. M. Yi, E. Trulls, V. Lepetit, and P. Fua. Lift: Learned invariant feature transform. *European Conference on Computer Vision*, 2016. 2
