# Supplementary material
Source: ML conference proceedings conference paper supplement (https://openaccess.thecvf.com/content/cvpr_2017/html/Bian_GMS_Grid-based_Motion_2017_CVPR_paper.html)
Supplement: Supplementary file 1 [file Bian_GMS_Grid-based_Motion_2017_CVPR_supplemental.pdf › Supplementary/VideDemoLInk.txt]

Please refer to

http://jwbian.net/gms

for video
