# Supplementary material
Source: ML conference proceedings conference paper supplement (https://openaccess.thecvf.com/content/cvpr_2017/html/Bian_GMS_Grid-based_Motion_2017_CVPR_paper.html)

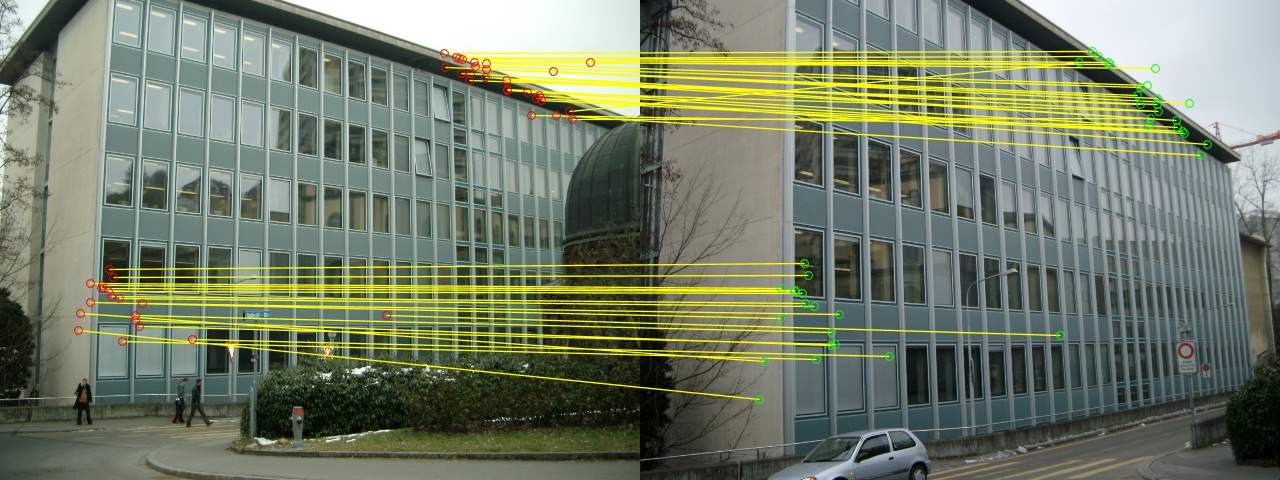

Supplement: Supplementary file 1 [file Bian_GMS_Grid-based_Motion_2017_CVPR_supplemental.pdf › Supplementary/GMS_ZuBud/1.jpg]

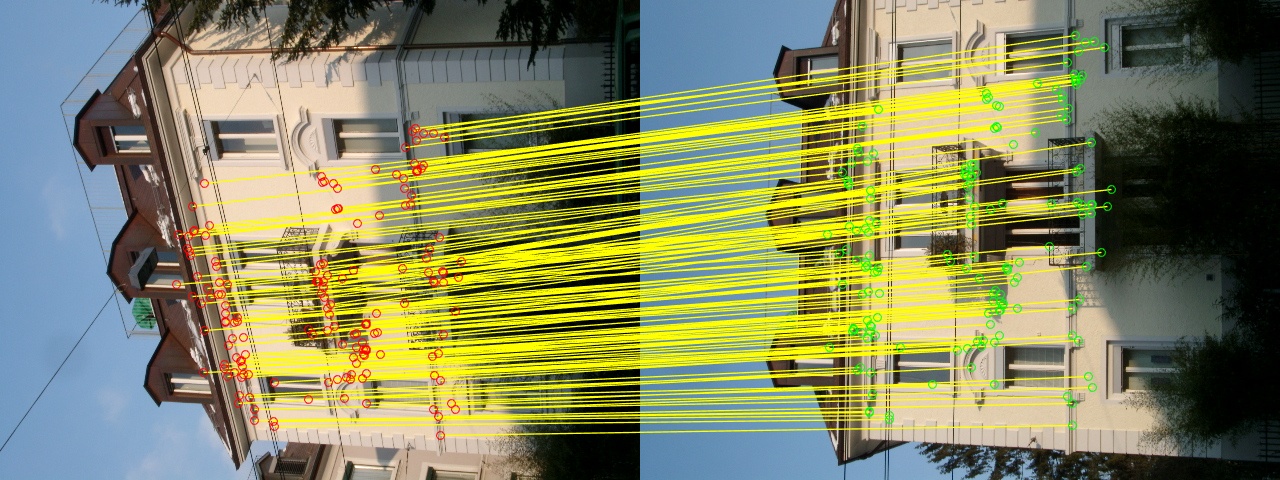

Supplement: Supplementary file 1 [file Bian_GMS_Grid-based_Motion_2017_CVPR_supplemental.pdf › Supplementary/GMS_ZuBud/10.jpg]

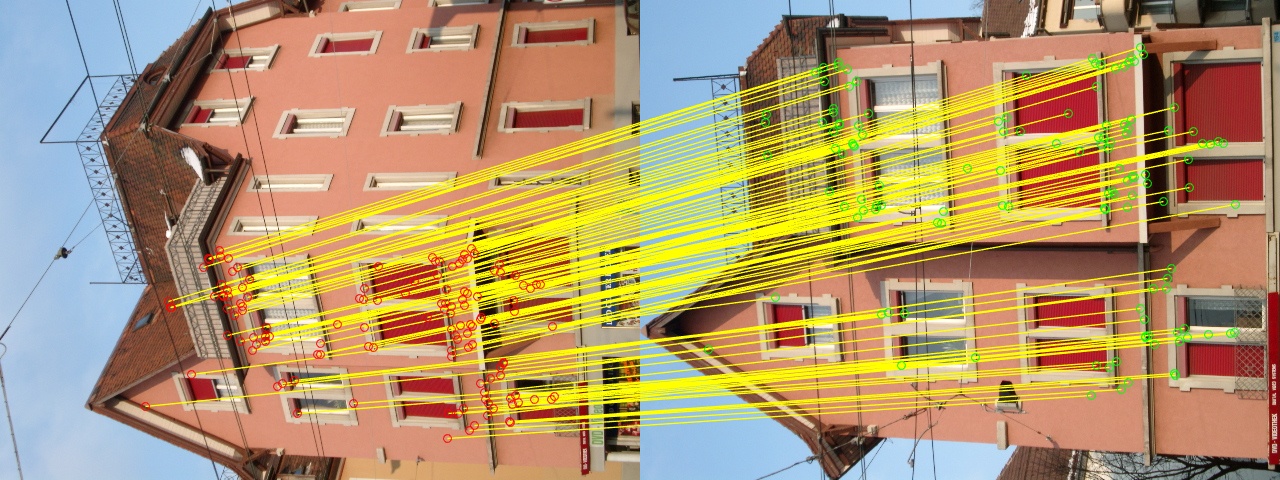

Supplement: Supplementary file 1 [file Bian_GMS_Grid-based_Motion_2017_CVPR_supplemental.pdf › Supplementary/GMS_ZuBud/11.jpg]

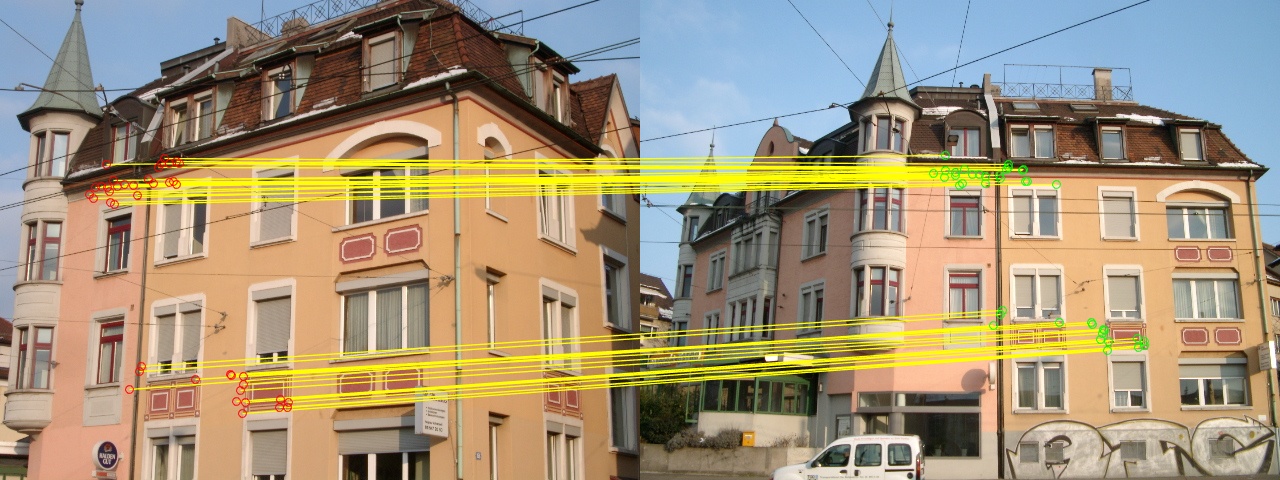

Supplement: Supplementary file 1 [file Bian_GMS_Grid-based_Motion_2017_CVPR_supplemental.pdf › Supplementary/GMS_ZuBud/12.jpg]

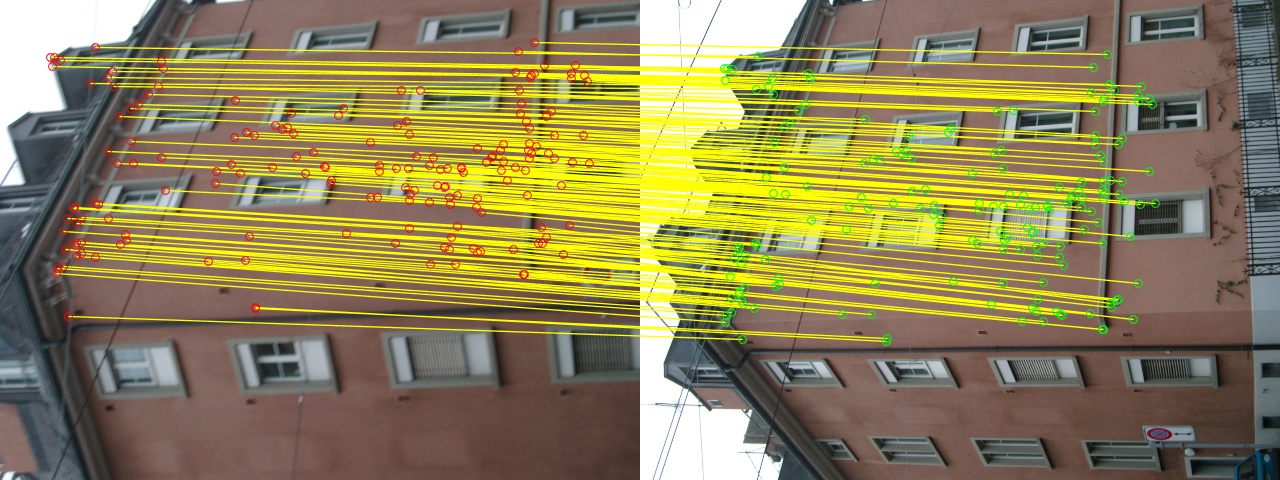

Supplement: Supplementary file 1 [file Bian_GMS_Grid-based_Motion_2017_CVPR_supplemental.pdf › Supplementary/GMS_ZuBud/13.jpg]

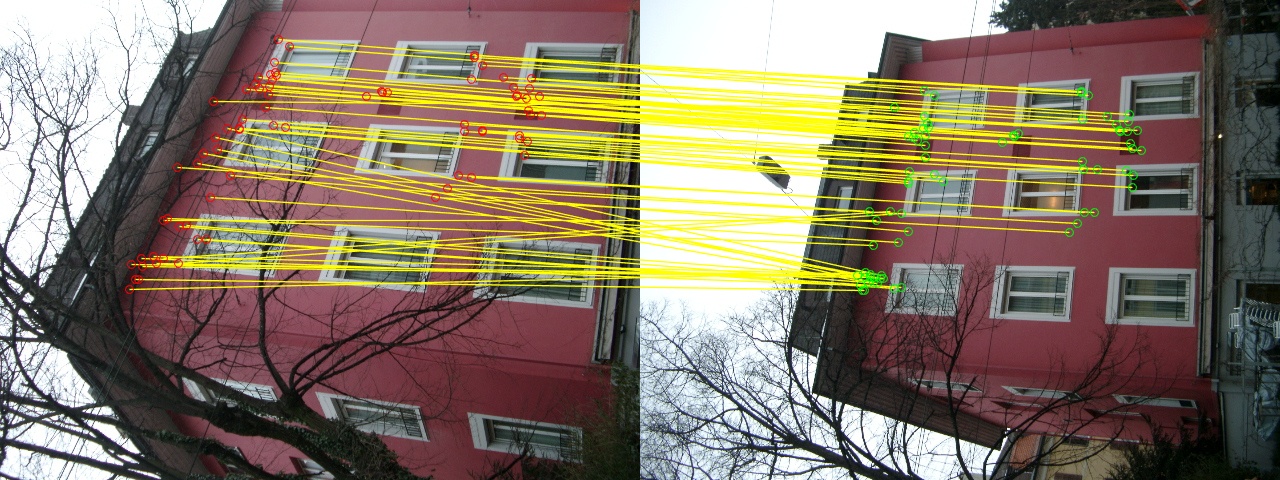

Supplement: Supplementary file 1 [file Bian_GMS_Grid-based_Motion_2017_CVPR_supplemental.pdf › Supplementary/GMS_ZuBud/14.jpg]

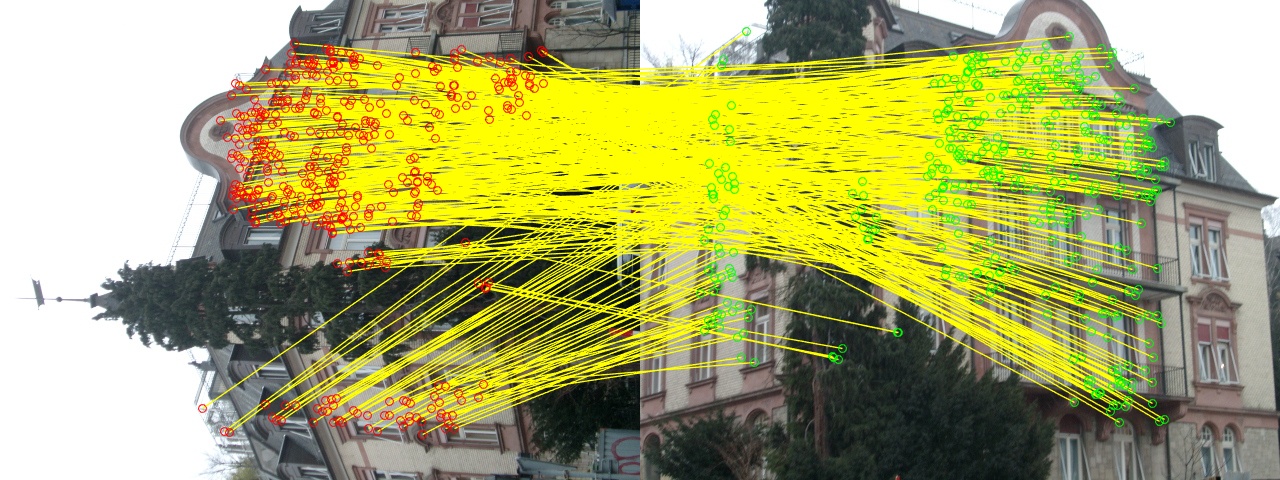

Supplement: Supplementary file 1 [file Bian_GMS_Grid-based_Motion_2017_CVPR_supplemental.pdf › Supplementary/GMS_ZuBud/15.jpg]

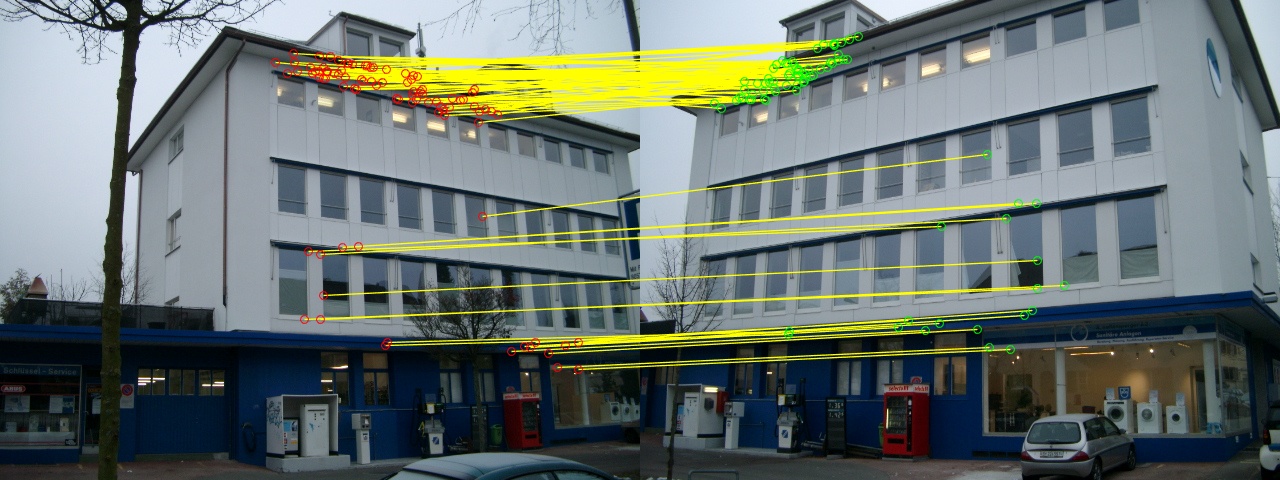

Supplement: Supplementary file 1 [file Bian_GMS_Grid-based_Motion_2017_CVPR_supplemental.pdf › Supplementary/GMS_ZuBud/16.jpg]

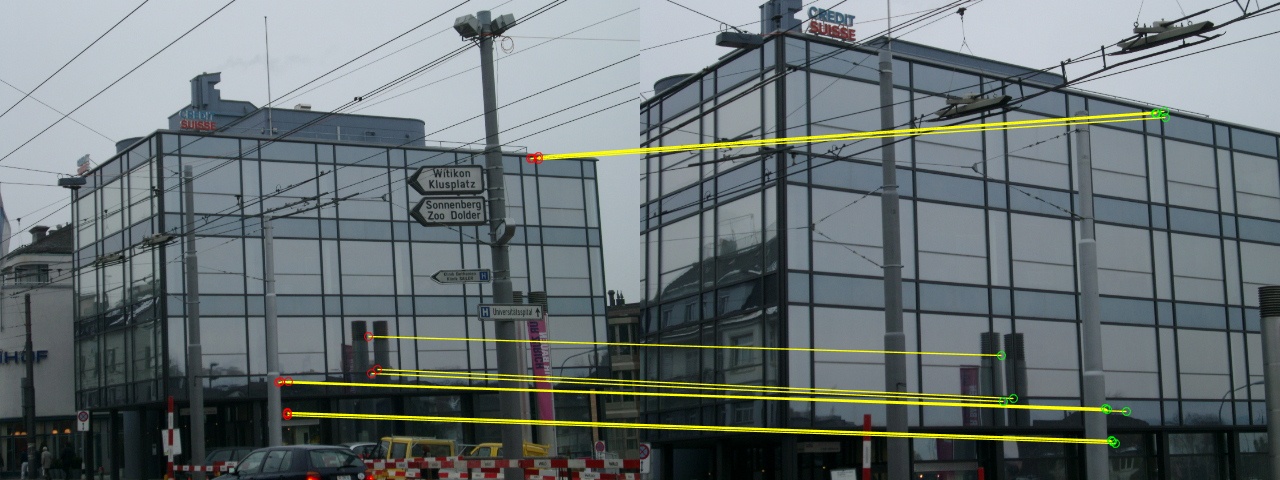

Supplement: Supplementary file 1 [file Bian_GMS_Grid-based_Motion_2017_CVPR_supplemental.pdf › Supplementary/GMS_ZuBud/17.jpg]

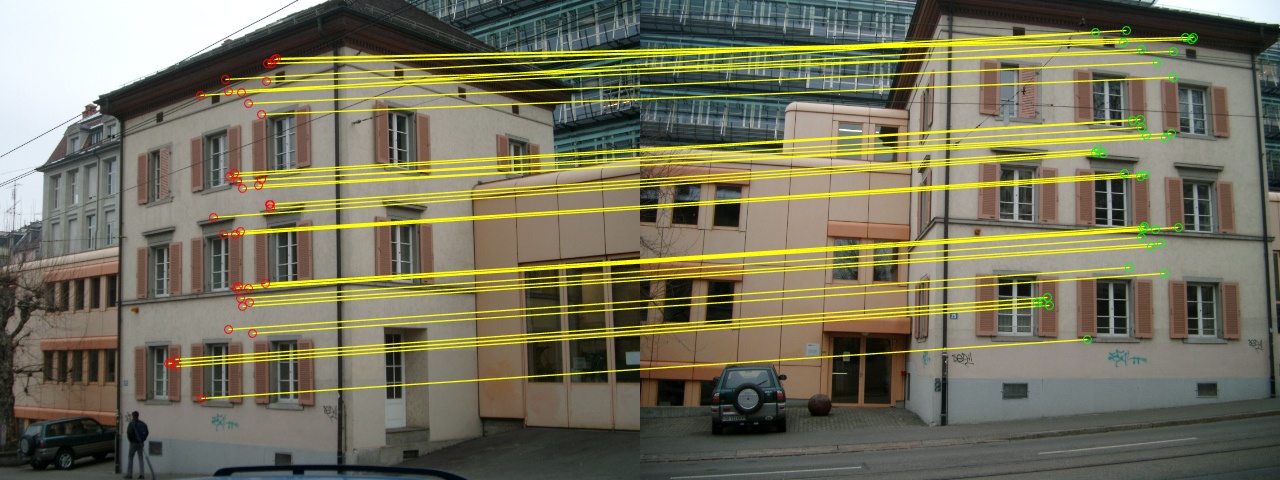

Supplement: Supplementary file 1 [file Bian_GMS_Grid-based_Motion_2017_CVPR_supplemental.pdf › Supplementary/GMS_ZuBud/2.jpg]

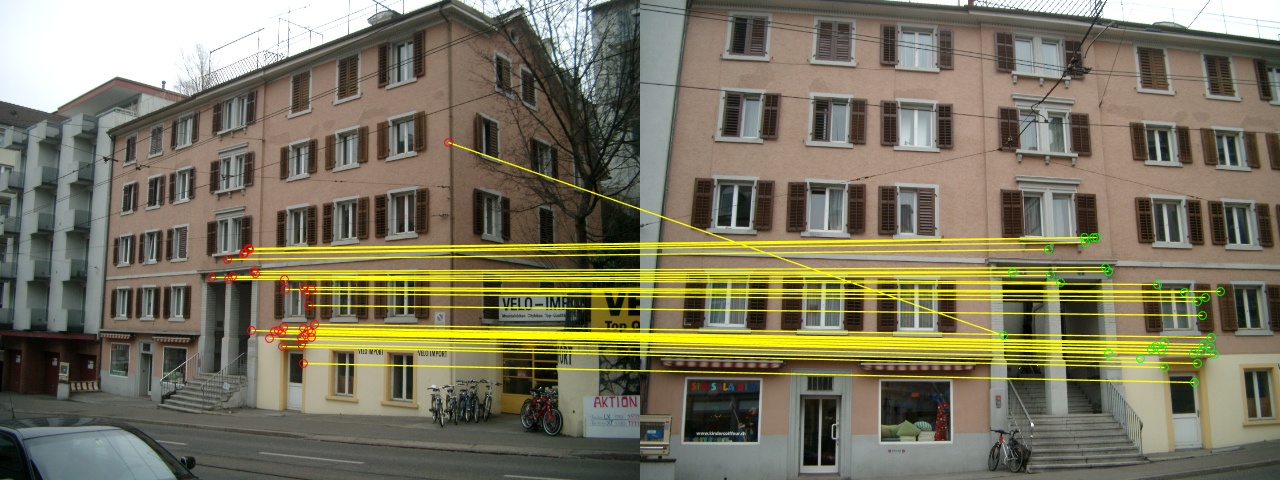

Supplement: Supplementary file 1 [file Bian_GMS_Grid-based_Motion_2017_CVPR_supplemental.pdf › Supplementary/GMS_ZuBud/3.jpg]

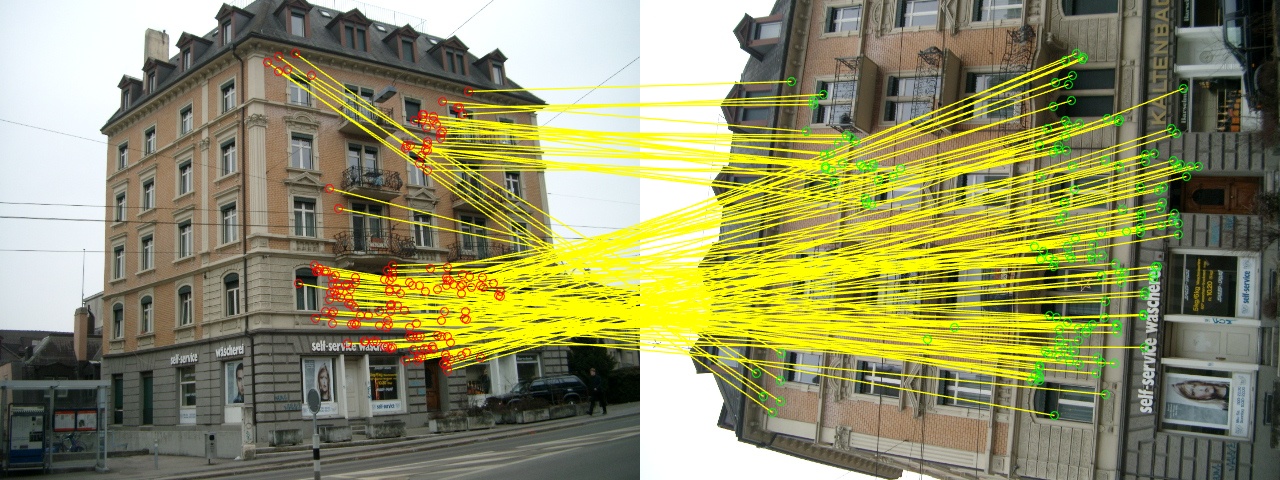

Supplement: Supplementary file 1 [file Bian_GMS_Grid-based_Motion_2017_CVPR_supplemental.pdf › Supplementary/GMS_ZuBud/4.jpg]

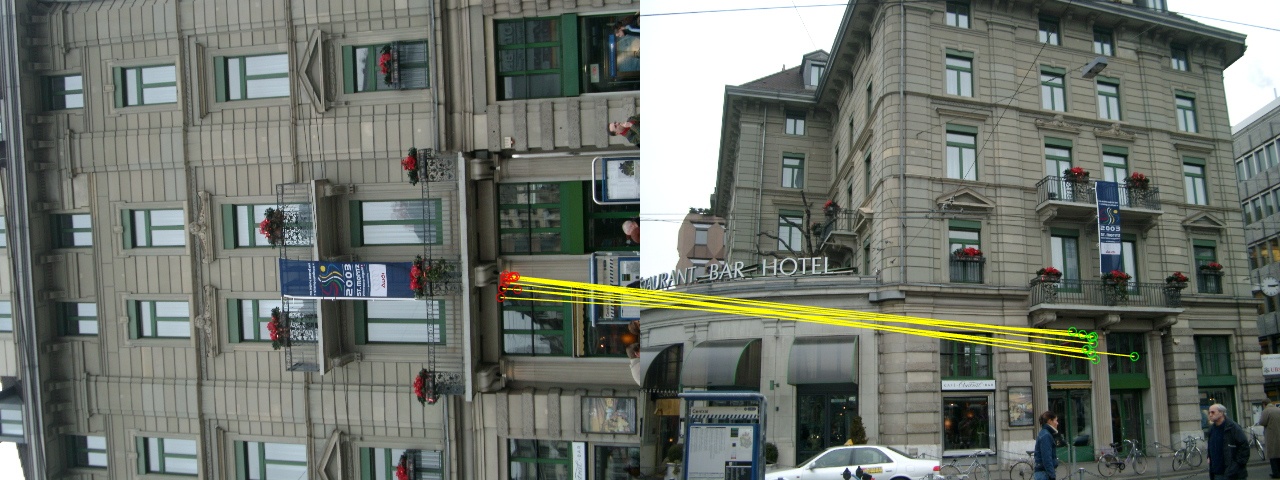

Supplement: Supplementary file 1 [file Bian_GMS_Grid-based_Motion_2017_CVPR_supplemental.pdf › Supplementary/GMS_ZuBud/5.jpg]

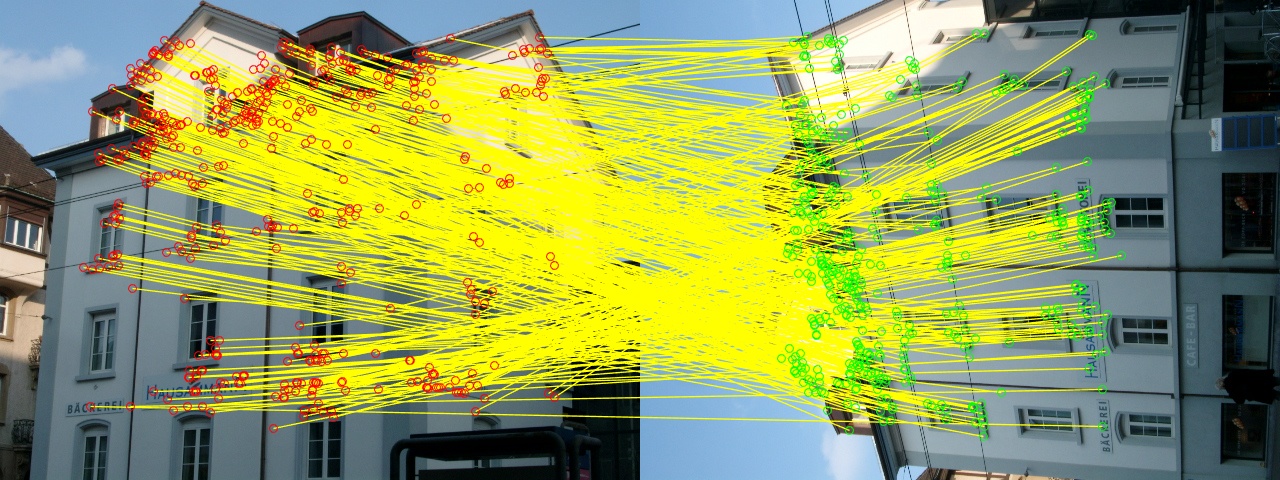

Supplement: Supplementary file 1 [file Bian_GMS_Grid-based_Motion_2017_CVPR_supplemental.pdf › Supplementary/GMS_ZuBud/6.jpg]

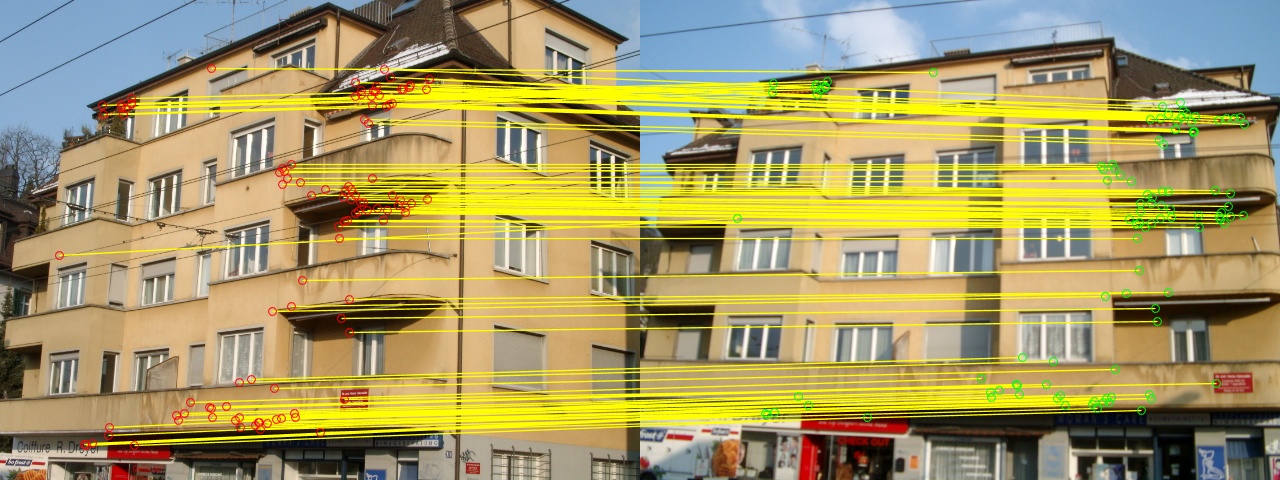

Supplement: Supplementary file 1 [file Bian_GMS_Grid-based_Motion_2017_CVPR_supplemental.pdf › Supplementary/GMS_ZuBud/7.jpg]

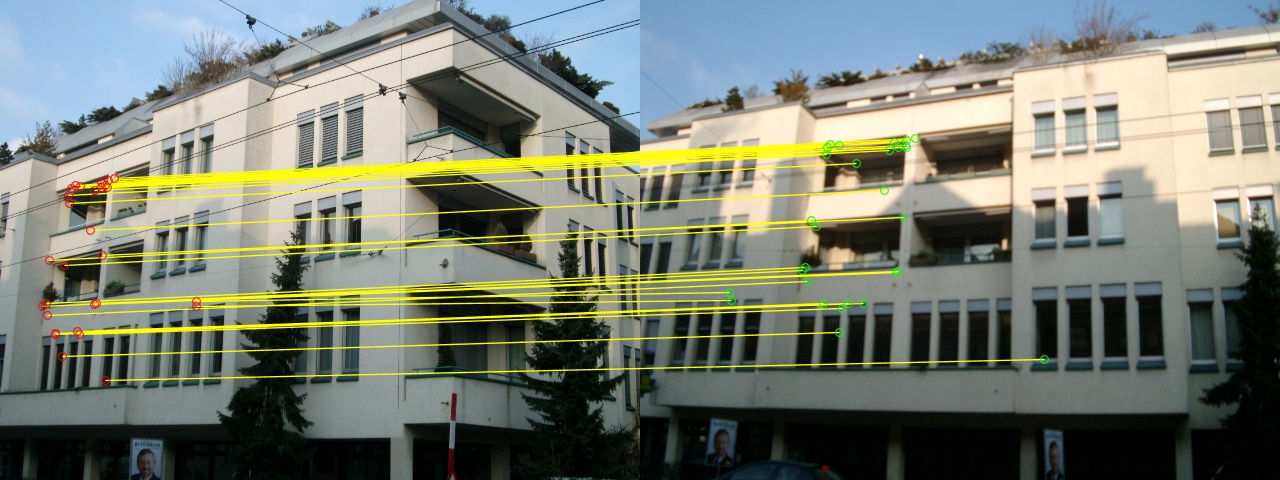

Supplement: Supplementary file 1 [file Bian_GMS_Grid-based_Motion_2017_CVPR_supplemental.pdf › Supplementary/GMS_ZuBud/8.jpg]

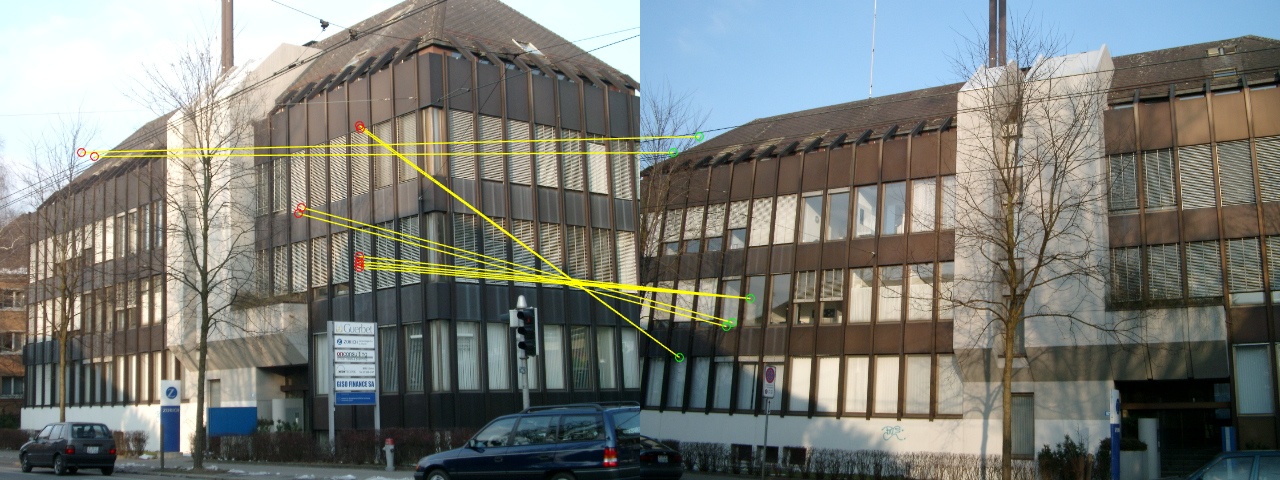

Supplement: Supplementary file 1 [file Bian_GMS_Grid-based_Motion_2017_CVPR_supplemental.pdf › Supplementary/GMS_ZuBud/9.jpg]
